# Supplementary material for: Improvement of the Dengue Virus (DENV) Nonhuman Primate Model via a Reverse Translational Approach Based on Dengue Vaccine Clinical Efficacy Data against DENV-2 and -4
Source: PubMed Central journal article supplement (PMC5974474; doi:10.1128/jvi.00440-18), 2018-05-29
Supplement: JVI.00440-18_zjv012183587s1.pdf [file JVI.00440-18_zjv012183587s1.pdf]

**Supplementary Table S1. CYD RNAemia following immunization with CYD-TDV or MV  
CYD-2**

| CYD   | Group         | RNA-positive macaques | Genomic RNA peak                            | Detection duration |
|-------|---------------|-----------------------|---------------------------------------------|--------------------|
|       |               | N/total               | $\log_{10} \pm \text{SD GEQ/mL / Peak Day}$ | Days mean $\pm$ SD |
| CYD-1 | CYD-TDV#CYD14 | 1 /6                  | 2.8 $\pm$ 0.2 / D2                          | 0.2 $\pm$ 0.4      |
|       | CYD-TDV#CYD15 | 0 /6                  | <2.8                                        | NA                 |
|       | CYD-TDV#CYD23 | 0 /6                  | <2.8                                        | NA                 |
| CYD-2 | MV #CYD15     | 5 /6                  | 3.5 $\pm$ 0.7 / D2                          | 2.0 $\pm$ 1.7      |
|       | MV #CYD14     | 4 /7                  | 3.2 $\pm$ 0.6 / D2                          | 1.3 $\pm$ 1.5      |
|       | CYD-TDV#CYD14 | 5 /6                  | 3.4 $\pm$ 0.6 / D2                          | 1.2 $\pm$ 1.0      |
|       | CYD-TDV#CYD15 | 2 /6                  | 2.8 $\pm$ 0.3 / D2                          | 0.3 $\pm$ 0.5      |
|       | CYD-TDV#CYD23 | 2 /6                  | 2.8 $\pm$ 0.3 / D2                          | 0.3 $\pm$ 0.5      |
| CYD-3 | CYD-TDV#CYD14 | 2 /6                  | 2.9 $\pm$ 0.5 / D2                          | 0.3 $\pm$ 0.5      |
|       | CYD-TDV#CYD15 | 1 /6                  | 2.9 $\pm$ 0.4 / D2                          | 0.2 $\pm$ 0.4      |
|       | CYD-TDV#CYD23 | 2 /6                  | 2.9 $\pm$ 0.5 / D2                          | 0.3 $\pm$ 0.5      |
| CYD-4 | CYD-TDV#CYD14 | 6 /6                  | 3.9 $\pm$ 0.5 / D7-8                        | 4.7 $\pm$ 2.3      |
|       | CYD-TDV#CYD15 | 6 /6                  | 3.7 $\pm$ 0.5 / D5                          | 5.7 $\pm$ 1.4      |
|       | CYD-TDV#CYD23 | 6 /6                  | 3.5 $\pm$ 0.4 / D2                          | 4.7 $\pm$ 2.0      |

## Supplementary Table S2. Serum glutamate-pyruvate transaminase levels (UI/L) measured pre and post-DENV-2 challenge

Serum glutamate-pyruvate transaminase levels (UI/L) are indicated for monkeys from study B immunized with MV CYD-2 (top tables) or CYD-TDV (bottom table) vaccine formulations or for non-vaccinated monkeys (group F, bottom table). Bold characters: transaminase at least 2-fold above baseline levels. **(A)**, monovalent (MV) groups; **(B)** tetravalent (CYD-TDV) groups; **(C)**, control group

### (A)

| Group                      | Mk ID | D-10 | D4         | D7         | D14        | D28        |
|----------------------------|-------|------|------------|------------|------------|------------|
| <b>MV-CYD-2<br/>#CYD15</b> | CD168 | 67   | 48         | 72         | 42         | 42         |
|                            | CC808 | 93   | 47         | 46         | 35         | 31         |
|                            | CC884 | 51   | <b>184</b> | <b>265</b> | <b>209</b> | <b>107</b> |
|                            | CC664 | 76   | 65         | 57         | 45         | 39         |
|                            | CC891 | 43   | 48         | 44         | 37         | 37         |
|                            | CC958 | 44   | <b>90</b>  | <b>110</b> | <b>88</b>  | 58         |

| Group                      | Mk ID | D-10 | D4        | D7         | D14       | D28 |
|----------------------------|-------|------|-----------|------------|-----------|-----|
| <b>MV-CYD-2<br/>#CYD14</b> | CD205 | 37   | <b>76</b> | <b>133</b> | <b>93</b> | 73  |
|                            | CC687 | 57   | 41        | 53         | 38        | 36  |
|                            | CD598 | 43   | 39        | 41         | 34        | 47  |
|                            | CD232 | 200  | 40        | 44         | 43        | 67  |
|                            | CD028 | 44   | 65        | 66         | 61        | 54  |
|                            | CC691 | 40   | 66        | 66         | 61        | 53  |
|                            | CC833 | 74   | 48        | 44         | 42        | 43  |

### (B)

| Group                     | Mk ID | D-10 | D4        | D7         | D14        | D28       |
|---------------------------|-------|------|-----------|------------|------------|-----------|
| <b>CYD-TDV<br/>#CYD14</b> | CD390 | 55   | 81        | 90         | 72         | 28        |
|                           | CC651 | 60   | 80        | <b>181</b> | <b>152</b> | 31        |
|                           | CC631 | 35   | <b>78</b> | <b>80</b>  | 65         | <b>88</b> |
|                           | CD173 | 41   | 51        | 52         | 47         | 37        |
|                           | CD071 | 42   | 60        | 77         | 60         | 36        |
|                           | CC685 | 70   | 50        | 40         | 34         | 47        |
| <b>CYD-TDV<br/>#CYD15</b> | CC791 | 78   | 48        | 53         | 56         | 46        |
|                           | CD262 | 78   | 38        | 43         | 37         | 33        |
|                           | CC821 | 42   | 64        | 78         | 55         | 48        |
|                           | CD167 | 46   | 40        | 43         | 41         | 39        |
|                           | CD149 | 68   | 62        | 89         | 58         | 45        |
| CC916                     | 47    | 71   | 80        | 57         | 41         |           |
| <b>CYD-TDV<br/>#CYD23</b> | CD008 | 36   | 50        | 46         | 47         | 40        |
|                           | CD031 | 29   | <b>64</b> | <b>76</b>  | <b>65</b>  | 53        |
|                           | CC886 | 64   | 42        | 47         | 45         | 37        |
|                           | CD063 | 85   | 77        | 81         | 69         | 50        |
|                           | CC832 | 38   | 48        | 56         | 39         | 30        |
|                           | CD140 | 33   | 48        | 47         | 55         | 31        |

### (C)

| Group          | Mk ID | D-10 | D4 | D7  | D14 | D28 |
|----------------|-------|------|----|-----|-----|-----|
| <b>Control</b> | CF836 | 46   | 37 | 48  | 52  | 32  |
|                | CF839 | 57   | 54 | 64  | 50  | 41  |
|                | CF860 | 31   | 34 | 46  | 48  | 39  |
|                | CF868 | 54   | 55 | 59  | 57  | 43  |
|                | CF894 | 87   | 69 | 110 | 117 | 69  |
|                | CF950 | 85   | 84 | 89  | 67  | 64  |
|                | CF985 | 47   | 50 | 52  | 68  | 38  |

**Supplementary Table S3. Statistical analyses supporting FIG.4 and FIG.5**

**(A) Post-challenge DENV-specific IgM (Fig. 4B)**

| Comparison               | Estimate | Adjusted*<br>p-value | Adjusted*<br>lower<br>limit 95%<br>CI | Adjusted*<br>upper<br>limit 95%<br>CI | Result |
|--------------------------|----------|----------------------|---------------------------------------|---------------------------------------|--------|
| D-10 vs D4 for CYD23     | -0.19    | 0.9512               | -1.087                                | 0.706                                 | NS     |
| D-10 vs D7 for CYD23     | -1.445   | 0.1028               | -3.106                                | 0.216                                 | NS     |
| D-10 vs D14 for CYD23    | -1.57    | 0.0374               | -3.067                                | -0.074                                | S      |
| D-10 vs D28 for CYD23    | -0.69    | 0.0972               | -1.474                                | 0.094                                 | NS     |
| D-10 vs D4 for CYD_14_M  | -1.117   | 0.0057               | -1.946                                | -0.287                                | S      |
| D-10 vs D7 for CYD_14_M  | -4.394   | <.0001               | -5.932                                | -2.856                                | S      |
| D-10 vs D14 for CYD_14_M | -2.711   | <.0001               | -4.097                                | -1.326                                | S      |
| D-10 vs D28 for CYD_14_M | -1.142   | 0.0012               | -1.868                                | -0.416                                | S      |
| D-10 vs D4 for CYD_14_T  | -0.435   | 0.5428               | -1.332                                | 0.461                                 | NS     |
| D-10 vs D7 for CYD_14_T  | -1.715   | 0.0414               | -3.376                                | -0.054                                | S      |
| D-10 vs D14 for CYD_14_T | -1.357   | 0.0843               | -2.854                                | 0.139                                 | NS     |
| D-10 vs D28 for CYD_14_T | -0.546   | 0.24                 | -1.33                                 | 0.238                                 | NS     |
| D-10 vs D4 for CYD_15_M  | -1.19    | 0.0064               | -2.086                                | -0.293                                | S      |
| D-10 vs D7 for CYD_15_M  | -3.417   | <.0001               | -5.079                                | -1.756                                | S      |
| D-10 vs D14 for CYD_15_M | -1.842   | 0.0121               | -3.339                                | -0.346                                | S      |
| D-10 vs D28 for CYD_15_M | -0.602   | 0.1726               | -1.385                                | 0.182                                 | NS     |
| D-10 vs D4 for CYD_15_T  | -0.274   | 0.8475               | -1.17                                 | 0.622                                 | NS     |
| D-10 vs D7 for CYD_15_T  | -2.691   | 0.0008               | -4.352                                | -1.03                                 | S      |
| D-10 vs D14 for CYD_15_T | -2.579   | 0.0004               | -4.075                                | -1.082                                | S      |
| D-10 vs D28 for CYD_15_T | -0.645   | 0.1316               | -1.428                                | 0.139                                 | NS     |
| D-10 vs D4 for control   | -0.825   | 0.0519               | -1.654                                | 0.005                                 | NS     |
| D-10 vs D7 for control   | -4.883   | <.0001               | -6.421                                | -3.346                                | S      |
| D-10 vs D14 for control  | -6.187   | <.0001               | -7.573                                | -4.802                                | S      |
| D-10 vs D28 for control  | -2.083   | <.0001               | -2.809                                | -1.357                                | S      |

\* Dunnett Adjustment by treatment group

| Comparison                   | Estimate | Adjusted*<br>p-value | Adjusted*<br>lower<br>limit 95%<br>CI | Adjusted*<br>upper<br>limit 95%<br>CI | Result |
|------------------------------|----------|----------------------|---------------------------------------|---------------------------------------|--------|
| CYD23 vs control for D-10    | 0.037    | 0.9994               | -0.377                                | 0.452                                 | NS     |
| CYD_14_M vs control for D-10 | 0.389    | 0.0576               | -0.01                                 | 0.787                                 | NS     |
| CYD_14_T vs control for D-10 | 0.035    | 0.9996               | -0.38                                 | 0.45                                  | NS     |
| CYD_15_M vs control for D-10 | 0.046    | 0.9984               | -0.369                                | 0.461                                 | NS     |
| CYD_15_T vs control for D-10 | 0.024    | 0.9999               | -0.39                                 | 0.439                                 | NS     |
| CYD23 vs control for D4      | -0.597   | 0.6192               | -1.885                                | 0.691                                 | NS     |
| CYD_14_M vs control for D4   | 0.681    | 0.4632               | -0.557                                | 1.918                                 | NS     |
| CYD_14_T vs control for D4   | -0.354   | 0.9202               | -1.642                                | 0.934                                 | NS     |
| CYD_15_M vs control for D4   | 0.411    | 0.8655               | -0.877                                | 1.699                                 | NS     |
| CYD_15_T vs control for D4   | -0.526   | 0.7201               | -1.814                                | 0.762                                 | NS     |
| CYD23 vs control for D7      | -3.401   | 0.0041               | -5.867                                | -0.936                                | S      |
| CYD_14_M vs control for D7   | -0.101   | 1                    | -2.47                                 | 2.268                                 | NS     |
| CYD_14_T vs control for D7   | -3.134   | 0.0087               | -5.599                                | -0.668                                | S      |
| CYD_15_M vs control for D7   | -1.42    | 0.4206               | -3.885                                | 1.046                                 | NS     |
| CYD_15_T vs control for D7   | -2.168   | 0.1                  | -4.634                                | 0.297                                 | NS     |
| CYD23 vs control for D14     | -4.58    | <.0001               | -6.808                                | -2.351                                | S      |
| CYD_14_M vs control for D14  | -3.087   | 0.0026               | -5.228                                | -0.946                                | S      |
| CYD_14_T vs control for D14  | -4.795   | <.0001               | -7.023                                | -2.567                                | S      |
| CYD_15_M vs control for D14  | -4.299   | <.0001               | -6.527                                | -2.071                                | S      |
| CYD_15_T vs control for D14  | -3.584   | 0.0008               | -5.813                                | -1.356                                | S      |
| CYD23 vs control for D28     | -1.356   | 0.0148               | -2.493                                | -0.218                                | S      |
| CYD_14_M vs control for D28  | -0.552   | 0.5424               | -1.644                                | 0.541                                 | NS     |
| CYD_14_T vs control for D28  | -1.502   | 0.0062               | -2.639                                | -0.365                                | S      |
| CYD_15_M vs control for D28  | -1.435   | 0.0093               | -2.572                                | -0.298                                | S      |
| CYD_15_T vs control for D28  | -1.414   | 0.0105               | -2.551                                | -0.277                                | S      |

\* Dunnett Adjustment by Day

**(B) Post-challenge DENV-specific IgG (FIG 4.C)**

| Comparison               | Estimate | Adjusted*<br>p-value | Adjusted*<br>lower<br>limit 95%<br>CI | Adjusted*<br>upper<br>limit 95%<br>CI | Result |
|--------------------------|----------|----------------------|---------------------------------------|---------------------------------------|--------|
| D-10 vs D4 for CYD23     | -0.767   | 0.0098               | -1.375                                | -0.16                                 | S      |
| D-10 vs D7 for CYD23     | -1.891   | <.0001               | -2.435                                | -1.346                                | S      |
| D-10 vs D14 for CYD23    | -2.132   | <.0001               | -2.72                                 | -1.543                                | S      |
| D-10 vs D28 for CYD23    | -1.137   | 0.0016               | -1.882                                | -0.392                                | S      |
| D-10 vs D4 for CYD_14_M  | -1.935   | <.0001               | -2.498                                | -1.373                                | S      |
| D-10 vs D7 for CYD_14_M  | -3.098   | <.0001               | -3.602                                | -2.593                                | S      |
| D-10 vs D14 for CYD_14_M | -3.107   | <.0001               | -3.651                                | -2.562                                | S      |
| D-10 vs D28 for CYD_14_M | -2.971   | <.0001               | -3.661                                | -2.281                                | S      |
| D-10 vs D4 for CYD_14_T  | -1.755   | <.0001               | -2.363                                | -1.148                                | S      |
| D-10 vs D7 for CYD_14_T  | -2.466   | <.0001               | -3.011                                | -1.922                                | S      |
| D-10 vs D14 for CYD_14_T | -2.182   | <.0001               | -2.771                                | -1.594                                | S      |
| D-10 vs D28 for CYD_14_T | -2.408   | <.0001               | -3.153                                | -1.662                                | S      |
| D-10 vs D4 for CYD_15_M  | -1.866   | <.0001               | -2.474                                | -1.259                                | S      |
| D-10 vs D7 for CYD_15_M  | -3.472   | <.0001               | -4.017                                | -2.927                                | S      |
| D-10 vs D14 for CYD_15_M | -3.198   | <.0001               | -3.787                                | -2.61                                 | S      |
| D-10 vs D28 for CYD_15_M | -3.255   | <.0001               | -4.001                                | -2.51                                 | S      |
| D-10 vs D4 for CYD_15_T  | -0.951   | 0.0012               | -1.558                                | -0.343                                | S      |
| D-10 vs D7 for CYD_15_T  | -2.222   | <.0001               | -2.767                                | -1.677                                | S      |
| D-10 vs D14 for CYD_15_T | -2.355   | <.0001               | -2.944                                | -1.767                                | S      |
| D-10 vs D28 for CYD_15_T | -2.064   | <.0001               | -2.809                                | -1.318                                | S      |
| D-10 vs D4 for control   | -0.047   | 0.9985               | -0.609                                | 0.515                                 | NS     |
| D-10 vs D7 for control   | -0.028   | 0.9997               | -0.532                                | 0.476                                 | NS     |
| D-10 vs D14 for control  | -0.627   | 0.0202               | -1.171                                | -0.082                                | S      |
| D-10 vs D28 for control  | -1.609   | <.0001               | -2.299                                | -0.919                                | S      |

\* Dunnett Adjustment by treatment group

| Comparison                   | Estimate | Adjusted*<br>p-value | Adjusted*<br>lower<br>limit 95%<br>CI | Adjusted*<br>upper<br>limit 95%<br>CI | Result |
|------------------------------|----------|----------------------|---------------------------------------|---------------------------------------|--------|
| CYD23 vs control for D-10    | 2.311    | <.0001               | 1.416                                 | 3.205                                 | S      |
| CYD_14_M vs control for D-10 | 0.908    | 0.0355               | 0.048                                 | 1.767                                 | S      |
| CYD_14_T vs control for D-10 | 1.941    | <.0001               | 1.047                                 | 2.836                                 | S      |
| CYD_15_M vs control for D-10 | 0.784    | 0.1018               | -0.111                                | 1.678                                 | NS     |
| CYD_15_T vs control for D-10 | 2.029    | <.0001               | 1.134                                 | 2.923                                 | S      |
| CYD23 vs control for D14     | 3.816    | <.0001               | 3.367                                 | 4.265                                 | S      |
| CYD_14_M vs control for D14  | 3.388    | <.0001               | 2.957                                 | 3.819                                 | S      |
| CYD_14_T vs control for D14  | 3.497    | <.0001               | 3.048                                 | 3.946                                 | S      |
| CYD_15_M vs control for D14  | 3.355    | <.0001               | 2.907                                 | 3.804                                 | S      |
| CYD_15_T vs control for D14  | 3.757    | <.0001               | 3.308                                 | 4.206                                 | S      |
| CYD23 vs control for D28     | 1.839    | <.0001               | 1.275                                 | 2.402                                 | S      |
| CYD_14_M vs control for D28  | 2.27     | <.0001               | 1.729                                 | 2.811                                 | S      |
| CYD_14_T vs control for D28  | 2.74     | <.0001               | 2.177                                 | 3.304                                 | S      |
| CYD_15_M vs control for D28  | 2.43     | <.0001               | 1.867                                 | 2.994                                 | S      |
| CYD_15_T vs control for D28  | 2.483    | <.0001               | 1.92                                  | 3.047                                 | S      |
| CYD23 vs control for D4      | 3.031    | <.0001               | 2.042                                 | 4.02                                  | S      |
| CYD_14_M vs control for D4   | 2.796    | <.0001               | 1.846                                 | 3.746                                 | S      |
| CYD_14_T vs control for D4   | 3.65     | <.0001               | 2.661                                 | 4.639                                 | S      |
| CYD_15_M vs control for D4   | 2.603    | <.0001               | 1.614                                 | 3.593                                 | S      |
| CYD_15_T vs control for D4   | 2.932    | <.0001               | 1.943                                 | 3.921                                 | S      |
| CYD23 vs control for D7      | 4.173    | <.0001               | 3.797                                 | 4.55                                  | S      |
| CYD_14_M vs control for D7   | 3.977    | <.0001               | 3.616                                 | 4.339                                 | S      |
| CYD_14_T vs control for D7   | 4.38     | <.0001               | 4.003                                 | 4.756                                 | S      |
| CYD_15_M vs control for D7   | 4.228    | <.0001               | 3.851                                 | 4.604                                 | S      |
| CYD_15_T vs control for D7   | 4.222    | <.0001               | 3.846                                 | 4.599                                 | S      |

\* Dunnett Adjustment by Day

**(C) Homotypic and heterotypic neutralizing antibody responses after DENV-2 challenge (FIG. 5)**

| Comparisons   | Estimated difference (log10) | Adjusted p-value | Adjusted Lower 95% CI (log10) | Adjusted Upper 95% CI (log10) |
|---------------|------------------------------|------------------|-------------------------------|-------------------------------|
| DEN1 vs. DEN2 | -0.37                        | 0.06             | -0.75                         | 0.02                          |
| DEN1 vs. DEN3 | 1.34                         | <.0001           | 1.08                          | 1.60                          |
| DEN1 vs. DEN4 | 0.56                         | 0.02             | 0.11                          | 1.00                          |
| DEN2 vs. DEN3 | 1.71                         | <.0001           | 1.45                          | 1.97                          |
| DEN2 vs. DEN4 | 0.93                         | 0.003            | 0.43                          | 1.43                          |
| DEN3 vs. DEN4 | -0.79                        | 0.001            | -1.14                         | -0.43                         |

|               |       |      |       |      |
|---------------|-------|------|-------|------|
| DEN1 vs. DEN2 | 0.42  | 0.27 | -0.31 | 1.15 |
| DEN1 vs. DEN3 | 0.83  | 0.01 | 0.23  | 1.44 |
| DEN1 vs. DEN4 | 0.52  | 0.36 | -0.52 | 1.56 |
| DEN2 vs. DEN3 | 0.42  | 0.02 | 0.08  | 0.75 |
| DEN2 vs. DEN4 | 0.10  | 0.79 | -0.29 | 0.49 |
| DEN3 vs. DEN4 | -0.32 | 0.28 | -0.88 | 0.25 |

|               |       |        |       |       |
|---------------|-------|--------|-------|-------|
| DEN1 vs. DEN2 | -0.59 | 0.02   | -1.08 | -0.10 |
| DEN1 vs. DEN3 | 0.73  | 0.02   | 0.17  | 1.29  |
| DEN1 vs. DEN4 | -0.12 | 0.85   | -0.65 | 0.42  |
| DEN2 vs. DEN3 | 1.32  | <.0001 | 1.12  | 1.53  |
| DEN2 vs. DEN4 | 0.48  | 0.09   | -0.08 | 1.03  |
| DEN3 vs. DEN4 | -0.85 | 0.02   | -1.47 | -0.22 |

| Comparison DEN2                       | Estimated difference (log10) | p-value | Lower 95% CI (log10) | Upper 95% CI (log10) |
|---------------------------------------|------------------------------|---------|----------------------|----------------------|
| TDV #CYD14 at D7 vs. MV #CYD14 at D28 | 0.12                         | 0.30    | -0.12                | 0.37                 |
| TDV #CYD14 at D7 vs. MV #CYD14 at D7  | -0.20                        | 0.22    | -0.54                | 0.14                 |
| CYD-TDV at D7 vs. MV CYD-2 at D7      | -0.10                        | 0.43    | -0.36                | 0.16                 |

**Supplementary Table S4. Neutralizing antibody titers of vaccinated monkeys before and after DENV-2 challenge.** Titers were measured by SN50 assay at D-10 before challenge, and at D7 (CYD-TDV groups) or D28 (MV CYD-2 groups) after DENV-2 challenge. *SD: Standard Deviation*

| Serotype                |                 | Pre-challenge titers               |            | Post-challenge titers              |            |
|-------------------------|-----------------|------------------------------------|------------|------------------------------------|------------|
|                         |                 | log <sub>10</sub> SN <sub>50</sub> | SD         | log <sub>10</sub> SN <sub>50</sub> | SD         |
| <b>CYD-TDV batches</b>  |                 |                                    |            |                                    |            |
| <b>DENV-1</b>           | CYD-TDV #CYD14  | <b>2.4</b>                         | <b>0.4</b> | <b>4.0</b>                         | <b>0.6</b> |
|                         | CYD-TDV #CYD15  | <b>2.2</b>                         | <b>0.6</b> | <b>3.9</b>                         | <b>0.8</b> |
|                         | CYD-TDV #CYD23  | <b>2.2</b>                         | <b>0.7</b> | <b>3.5</b>                         | <b>0.5</b> |
| <b>DENV-2</b>           | CYD-TDV #CYD14  | <b>1.7</b>                         | <b>0.4</b> | <b>3.6</b>                         | <b>0.2</b> |
|                         | CYD-TDV #CYD15  | <b>1.6</b>                         | <b>0.3</b> | <b>3.7</b>                         | <b>0.4</b> |
|                         | CYD-TDV #CYD23  | <b>1.3</b>                         | <b>0.6</b> | <b>3.6</b>                         | <b>0.5</b> |
| <b>DENV-3</b>           | CYD-TDV #CYD14  | <b>1.6</b>                         | <b>0.4</b> | <b>3.2</b>                         | <b>0.3</b> |
|                         | CYD-TDV #CYD15  | <b>1.8</b>                         | <b>0.3</b> | <b>3.2</b>                         | <b>0.4</b> |
|                         | CYD-TDV #CYD23  | <b>1.4</b>                         | <b>0.6</b> | <b>2.8</b>                         | <b>0.4</b> |
| <b>DENV-4</b>           | CYD-TDV #CYD14  | <b>2.5</b>                         | <b>0.3</b> | <b>3.4</b>                         | <b>0.1</b> |
|                         | CYD-TDV #CYD15  | <b>2.5</b>                         | <b>0.2</b> | <b>3.4</b>                         | <b>0.2</b> |
|                         | CYD-TDV #CYD23  | <b>2.4</b>                         | <b>0.9</b> | <b>3.2</b>                         | <b>0.4</b> |
| <b>MV CYD-2 batches</b> |                 |                                    |            |                                    |            |
| <b>DENV-1</b>           | MV-CYD-2 #CYD14 | <b>0.8</b>                         | <b>0.2</b> | <b>2.7</b>                         | <b>0.5</b> |
|                         | MV-CYD-2 #CYD15 | <b>0.8</b>                         | <b>0.2</b> | <b>2.9</b>                         | <b>0.4</b> |
| <b>DENV-2</b>           | MV-CYD-2 #CYD14 | <b>1.4</b>                         | <b>0.4</b> | <b>3.3</b>                         | <b>0.3</b> |
|                         | MV-CYD-2 #CYD15 | <b>1.3</b>                         | <b>0.5</b> | <b>3.4</b>                         | <b>0.2</b> |
| <b>DENV-3</b>           | MV-CYD-2 #CYD14 | <b>&lt;1.0</b>                     | <b>NA</b>  | <b>2.1</b>                         | <b>0.4</b> |
|                         | MV-CYD-2 #CYD15 | <b>&lt;1.0</b>                     | <b>NA</b>  | <b>2.1</b>                         | <b>0.1</b> |
| <b>DENV-4</b>           | MV-CYD-2 #CYD14 | <b>1.5</b>                         | <b>0.2</b> | <b>2.6</b>                         | <b>0.3</b> |
|                         | MV-CYD-2 #CYD15 | <b>1.5</b>                         | <b>0.1</b> | <b>2.9</b>                         | <b>0.3</b> |

**Supplementary Table S5. Correlation Analysis of Post-Challenge Viremia with Several Pre-Challenge Immune Parameters.** DENV-2 viremia was estimated by calculation of the Area Under Curve (AUC) between day (D)1 and D5 after DENV-2 challenge, for each group. The average value per formulation (MV CYD-2, or CYD-TDV) was used in the comparisons. The following values were used for immune parameters: neutralizing antibodies (Nab), SN<sub>50</sub> geometric mean titers; YF NS1 ELISA, mean Relative Units, Dengue IgG and IgM ELISA, mean Relative Units (as defined in the commercial assays), IgM to IgG ratio, mean ratio. Pearson's correlation coefficients are shown. *Bold characters: significant correlation coefficient (p-value ≤0.05)*

| Parameter           | Day           | MV CYD-2 groups |              | CYD-TDV group |             |
|---------------------|---------------|-----------------|--------------|---------------|-------------|
|                     |               | Correlation     | <i>p</i>     | Correlation   | <i>p</i>    |
| Nab (pre-challenge) | D149 and D305 | <b>-0.68</b>    | <b>0.01</b>  | <b>-0.57</b>  | <b>0.01</b> |
| YF NS1 ELISA        | D28           | <b>-0.75</b>    | <b>0.003</b> | -0.33         | 0.29        |
|                     | D84           | -0.25           | 0.49         | -0.17         | 0.62        |
|                     | D305          | -0.54           | 0.06         | -0.52         | 0.08        |
| IgG ELISA           | D28           | -0.26           | 0.38         | -0.14         | 0.57        |
|                     | D49           | -0.35           | 0.24         | -0.35         | 0.15        |
|                     | D84           | -0.32           | 0.28         | -0.34         | 0.17        |
|                     | D305          | -0.46           | 0.11         | -0.16         | 0.52        |
| IgM ELISA           | D28           | -0.55           | <b>0.05</b>  | -0.03         | 0.92        |
|                     | D49           | -0.37           | 0.21         | -0.26         | 0.30        |
|                     | D84           | -0.39           | 0.19         | -0.30         | 0.22        |
|                     | D305          | 0.31            | 0.30         | -0.37         | 0.14        |
| IgM/IgG             | D28           | -0.27           | 0.37         | 0.10          | 0.68        |
|                     | D49           | 0.21            | 0.48         | 0.25          | 0.32        |
|                     | D84           | -0.29           | 0.34         | -0.28         | 0.26        |
|                     | D305          | 0.42            | 0.15         | -0.32         | 0.19        |
